# Supplementary material
Source: PubMed Central journal article supplement (PMC137784)

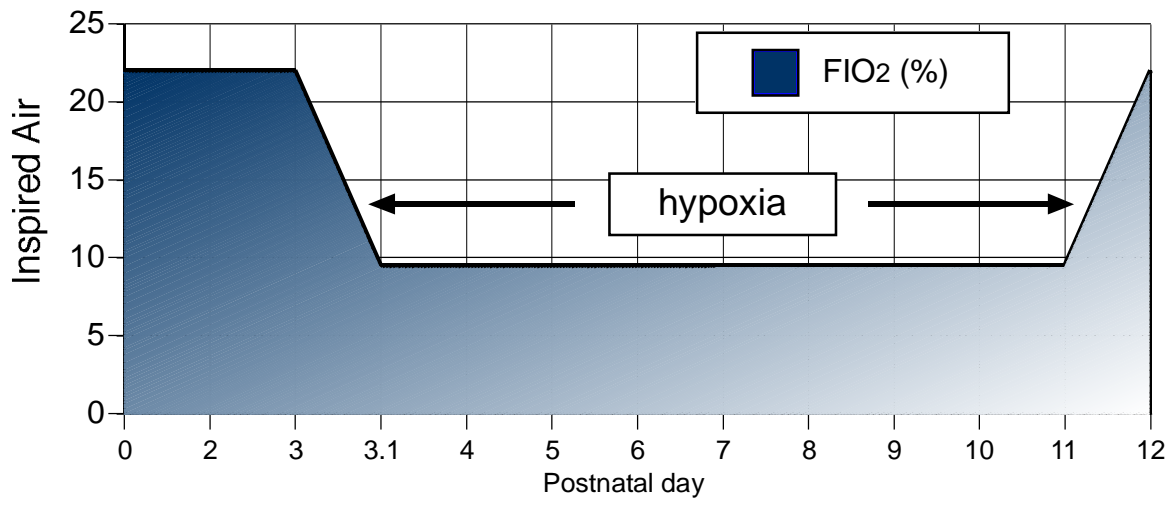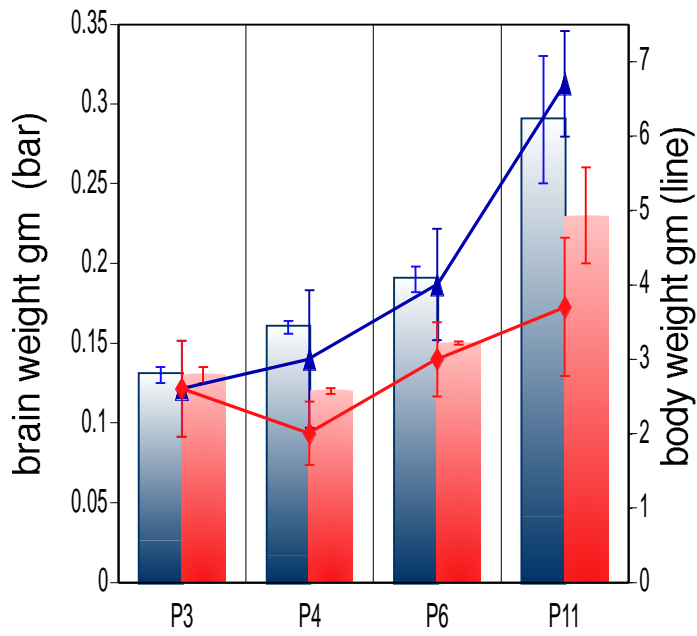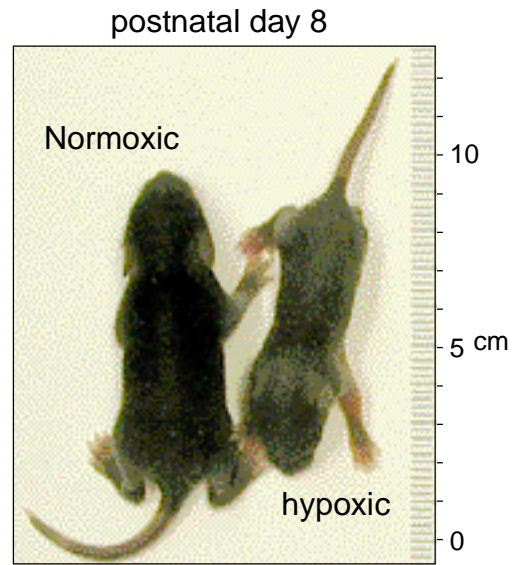

Supplement: pnas_232568799_2.pdf [file pnas_232568799_2.pdf]

**A**

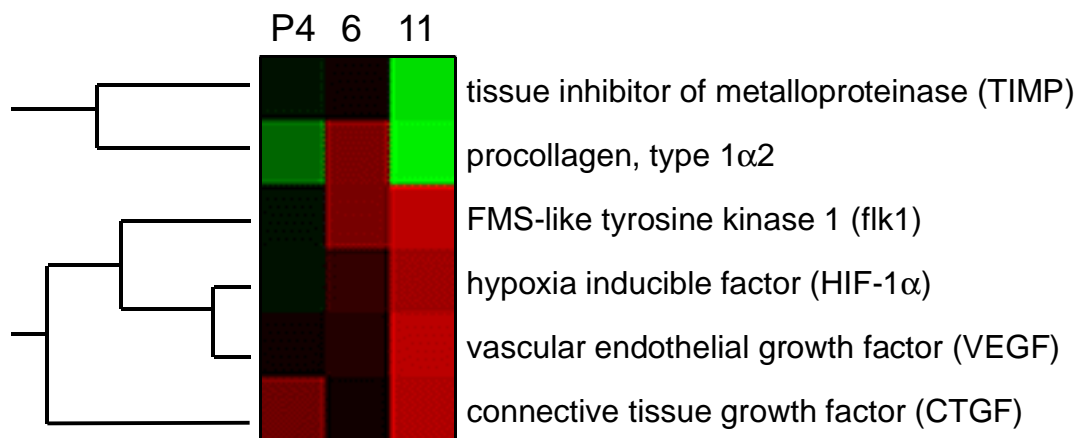

**B**

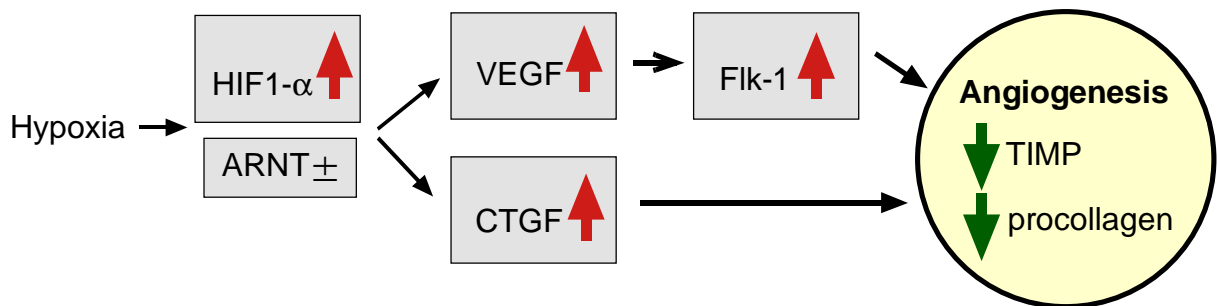

Supplement: pnas_232568799_6.pdf [file pnas_232568799_6.pdf]
